# Supplementary material
Source: PubMed Central journal article supplement (PMC4066230)
Supplement: Supp_Fig1.pdf [file Supp_Fig1.pdf]

## Supplementary Data

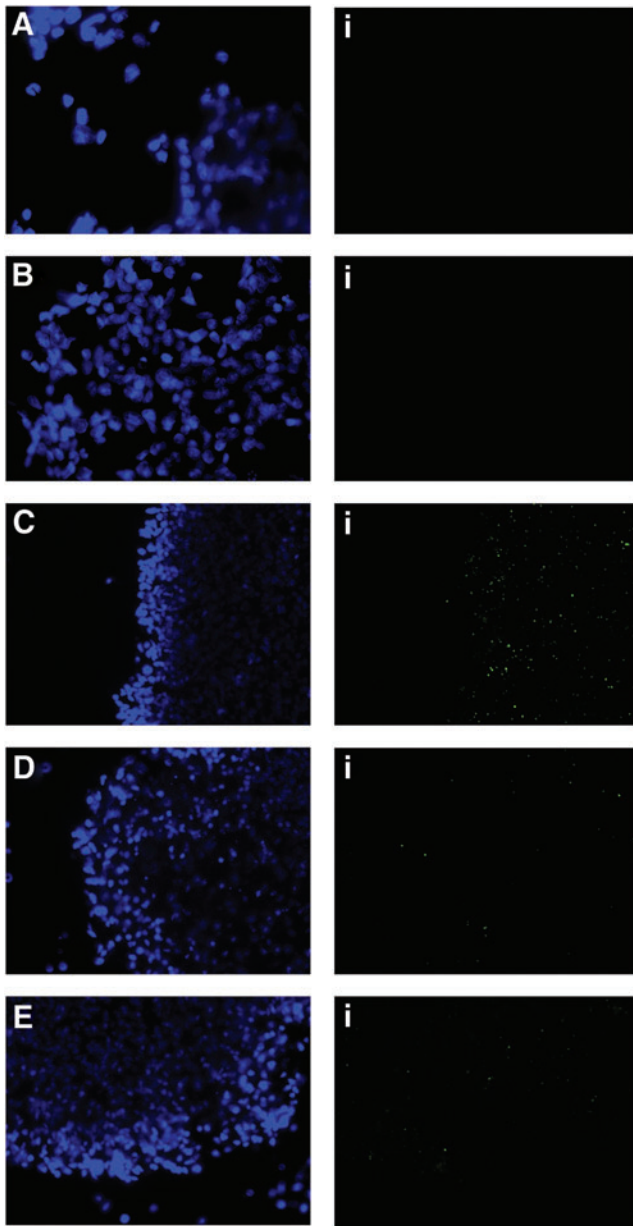

**SUPPLEMENTARY FIG. S1.** EquiPSCs express pluripotency factors. Negative controls incubated with goat serum in place of primary antibody showed no nonspecific staining of the secondary antibodies. (A) Immunocytochemistry for NANOG; staining with DAPI is shown first and the secondary antibody fluorescence in (i). (B) REX1. (C) SSEA4. (D) TRA1-60. (E) TRA1-81. equiPSCs, equine induced pluripotent stem cells.
