# Supplementary material
Source: PubMed Central journal article supplement (PMC4066230)
Supplement: Supp_Fig2.pdf [file Supp_Fig2.pdf]

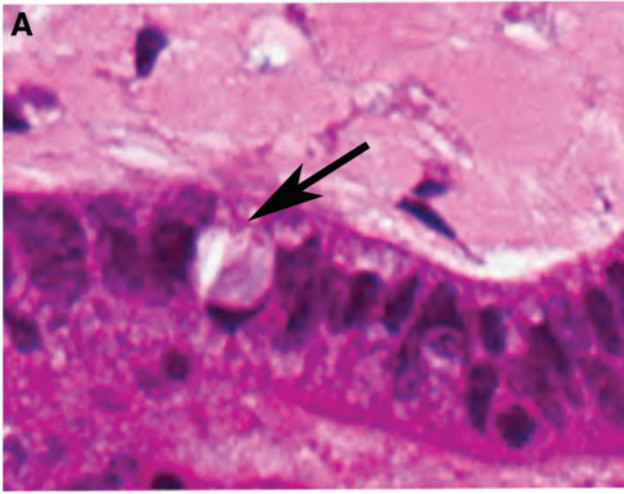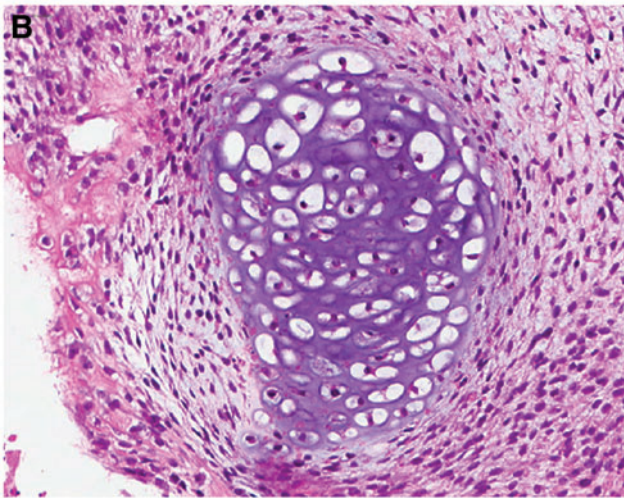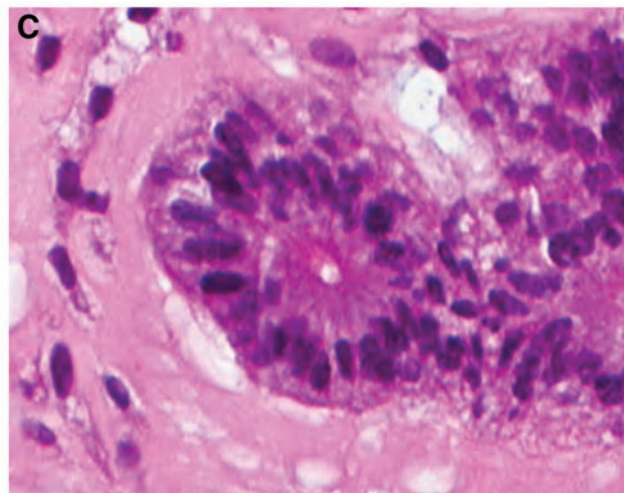

**SUPPLEMENTARY FIG. S2.** hiPSCs form teratomas in vitro. hiPSCs form teratomas in vitro that contain tissue derivatives of the three germ layers. (A) Pseudostratified columnar epithelium with goblet cells (*arrow*) (endoderm). (B) Cartilage (mesoderm). (C) Neural tissue (ectoderm). hiPSCs, human induced pluripotent stem cells.
