# Supplementary material
Source: PubMed Central journal article supplement (PMC4066230)
Supplement: Supp_Fig3.pdf [file Supp_Fig3.pdf]

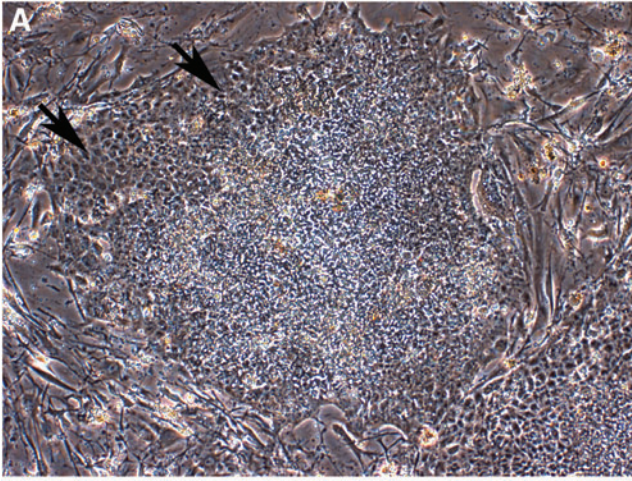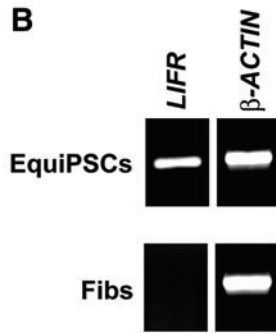

**SUPPLEMENTARY FIG. S3.** EquiPSCs require LIF to maintain pluripotency. (A) EquiPSCs cultured with bFGF alone, in the absence of LIF, spontaneously differentiate (*arrows*), indicating a dependency on LIF for maintaining pluripotency. (B) In keeping with this observation, equiPSCs robustly express the *LIFR*. LIF, leukemia inhibitory factor.
