# Supplementary material
Source: PubMed Central journal article supplement (PMC4066230)
Supplement: Supp_Table1.pdf [file Supp_Table1.pdf]

SUPPLEMENTARY TABLE S1. PRIMER SEQUENCES AND THEIR PRODUCT SIZES

| <i>Gene</i>                  | <i>Primers</i>                                                         | <i>Product size (bp)</i> |
|------------------------------|------------------------------------------------------------------------|--------------------------|
| <i>eqNANOG</i>               | Forward: AGTCCCAGAGTAAAACCGCTG<br>Reverse: TGCTAGTCTTCGGCCAGTTG        | 280                      |
| <i>eqOCT4</i>                | Forward: GGGACCTCCTAGTGGGTCA<br>Reverse: TGGCAAATTGCTCGAGGTCT          | 318                      |
| <i>eqTERT</i>                | Forward: GTGGAGCTGCTCAGGTCATT<br>Reverse: GTCATACGCCCCATCACAT          | 495                      |
| <i>eqβ-ACTIN</i>             | Forward: ATGGTGGCAATGGGTCAGAAGGAC<br>Reverse: CTCTTTGATGTCACGCACGATTTT | 550                      |
| <i>eqCXCR4</i>               | Forward: AAGTGACTCCGAGGACTTGAG<br>Reverse: GAAGCAGGGCTCTTTCAGGGA       | 151                      |
| <i>eqAFP</i>                 | Forward: ACCCCGAACTCTCCAAGCTA<br>Reverse: CAACTGTGGGCAATTTACAGCA       | 233                      |
| <i>eqβIII-TUBULIN</i>        | Forward: TTCGTGGAGTGGATCCCCA<br>Reverse: GGCGGTGTCAGTGGCTACAT          | 402                      |
| <i>eqNESTIN</i>              | Forward: ATCAGATGACATTGGGACCTC<br>Reverse: ATCCAATTCTTGGTCCCCAC        | 512                      |
| <i>eqCOLL2A1</i>             | Forward: AGGATTGCCAGGCCCTCAAG<br>Reverse: CATGTACTGCAGGGGGTCAG         | 400                      |
| <i>eqGATA2</i>               | Forward: GGAAGTGTCTCCTGACCCCA<br>Reverse: TCATCTTGTGGTAGAGCCCCG        | 440                      |
| <i>eqXIST</i>                | Forward: GGTGTGTGAGTGGACCTACG<br>Reverse: CGGACCCTGTGCCTAAGTTT         | 349                      |
| <i>eqLIFR</i>                | Forward: TGTGCTGTTTGTCAATGCCG<br>Reverse: GGGCCACCATCTCAAATCCA         | 540                      |
| <i>hOCT4-IRES2</i> transgene | Forward: AGTGAGAGGCAACCTGGAGA<br>Reverse: AGGAACTGCTTCCTTCACGA         | 657                      |
| <i>hSOX2-IRES2</i> transgene | Forward: TGGCTCTCCTCAAGCGTATT<br>Reverse: GCTTAGCCTCGTCGATGAAC         | 498                      |
| <i>hcMYC-IRES2</i> transgene | Forward: TGGCTCTCCTCAAGCGTATT<br>Reverse: CTGGTAGAAGTTCTCCTCCTCG       | 350                      |
| <i>hKLF4-IRES2</i> transgene | Forward: GTCCTGCATGCCAGAGGAG<br>Reverse: AGGAACTGCTTCCTTCACGA          | 563                      |
